# Supplementary material for: Effectiveness of the AS04‐adjuvanted HPV‐16/18 vaccine in reducing oropharyngeal HPV infections in young females—Results from a community‐randomized trial
Source: PubMed Central journal article supplement (PMC7318585; doi:10.1002/ijc.32791), 2019-12-14
Supplement: IJC-147-170-s001.pdf [file IJC-147-170-s001.pdf]

**Effectiveness of the AS04-adjuvanted HPV-16/18 vaccine in reducing oropharyngeal HPV infections in young females – results from a community-randomized trial**

Matti Lehtinen, Dan Apter, Tiina Eriksson, Katja Harjula, Mari Hokkanen, Tuomas Lehtinen, Kari Natunen, Silvia Damaso, Maaria Soila, Dan Bi, Frank Struyf

Table of content:

- Supplementary table 1. Prevalence of oropharyngeal infections, by individual oncogenic HPV type, Arm and Vaccine group, for birth cohorts 1994-1995 (Female study participants, Total enrolled cohort).

Supplementary table 1. Prevalence of oropharyngeal infections, by individual oncogenic HPV type, Arm and Vaccine group, for birth cohorts 1994-1995 (Female study participants, Total enrolled cohort).

| HPV Type | Group          | Arm A |    |    |     | Arm B |    |    |     | Arm C |    |    |     |
|----------|----------------|-------|----|----|-----|-------|----|----|-----|-------|----|----|-----|
|          |                | N     | n+ | n  | %   | N     | n+ | n  | %   | N     | n+ | n  | %   |
| 6        | AS04-HPV-16/18 | 1606  | 10 | 21 | 1.3 | 1586  | 9  | 15 | 0.9 | -     | -  | -  | -   |
|          | HBV            | 203   | 0  | 0  | 0.0 | 191   | 1  | 2  | 1.0 | 1446  | 10 | 19 | 1.3 |
|          | Not vaccinated | 290   | 2  | 2  | 0.7 | 344   | 2  | 4  | 1.2 | 233   | 6  | 8  | 3.4 |
| 11       | AS04-HPV-16/18 | 1606  | 3  | 3  | 0.2 | 1586  | 2  | 2  | 0.1 | -     | -  | -  | -   |
|          | HBV            | 203   | 1  | 1  | 0.5 | 191   | 1  | 1  | 0.5 | 1446  | 3  | 3  | 0.2 |
|          | Not vaccinated | 290   | 1  | 1  | 0.3 | 344   | 0  | 0  | 0.0 | 233   | 2  | 2  | 0.9 |
| 16       | AS04-HPV-16/18 | 1606  | 2  | 2  | 0.1 | 1586  | 3  | 4  | 0.3 | -     | -  | -  | -   |
|          | HBV            | 203   | 1  | 1  | 0.5 | 191   | 1  | 1  | 0.5 | 1446  | 8  | 13 | 0.9 |
|          | Not vaccinated | 290   | 2  | 2  | 0.7 | 344   | 3  | 3  | 0.9 | 233   | 3  | 6  | 2.6 |
| 18       | AS04-HPV-16/18 | 1606  | 2  | 3  | 0.2 | 1586  | 1  | 1  | 0.1 | -     | -  | -  | -   |
|          | HBV            | 203   | 2  | 2  | 1.0 | 191   | 1  | 1  | 0.5 | 1446  | 4  | 7  | 0.5 |
|          | Not vaccinated | 290   | 2  | 2  | 0.7 | 344   | 2  | 2  | 0.6 | 233   | 3  | 3  | 1.3 |
| 31       | AS04-HPV-16/18 | 1606  | 1  | 1  | 0.1 | 1586  | 1  | 1  | 0.1 | -     | -  | -  | -   |
|          | HBV            | 203   | 0  | 0  | 0.0 | 191   | 0  | 0  | 0.0 | 1446  | 4  | 6  | 0.4 |
|          | Not vaccinated | 290   | 0  | 0  | 0.0 | 344   | 0  | 0  | 0.0 | 233   | 2  | 2  | 0.9 |
| 33       | AS04-HPV-16/18 | 1606  | 2  | 2  | 0.1 | 1586  | 3  | 4  | 0.3 | -     | -  | -  | -   |
|          | HBV            | 203   | 0  | 0  | 0.0 | 191   | 1  | 1  | 0.5 | 1446  | 6  | 9  | 0.6 |
|          | Not vaccinated | 290   | 2  | 3  | 1.0 | 344   | 2  | 3  | 0.9 | 233   | 0  | 0  | 0.0 |
| 34       | AS04-HPV-16/18 | 1606  | 0  | 0  | 0.0 | 1586  | 1  | 1  | 0.1 | -     | -  | -  | -   |
|          | HBV            | 203   | 0  | 0  | 0.0 | 191   | 1  | 1  | 0.5 | 1446  | 0  | 0  | 0.0 |
|          | Not vaccinated | 290   | 0  | 0  | 0.0 | 344   | 0  | 0  | 0.0 | 233   | 0  | 0  | 0.0 |
| 35       | AS04-HPV-16/18 | 1606  | 1  | 2  | 0.1 | 1586  | 1  | 1  | 0.1 | -     | -  | -  | -   |
|          | HBV            | 203   | 0  | 0  | 0.0 | 191   | 0  | 0  | 0.0 | 1446  | 2  | 3  | 0.2 |
|          | Not vaccinated | 290   | 0  | 0  | 0.0 | 344   | 0  | 0  | 0.0 | 233   | 0  | 0  | 0.0 |
| 39       | AS04-HPV-16/18 | 1606  | 6  | 9  | 0.6 | 1586  | 4  | 6  | 0.4 | -     | -  | -  | -   |
|          | HBV            | 203   | 1  | 1  | 0.5 | 191   | 1  | 1  | 0.5 | 1446  | 5  | 6  | 0.4 |
|          | Not vaccinated | 290   | 1  | 1  | 0.3 | 344   | 3  | 3  | 0.9 | 233   | 1  | 1  | 0.4 |
| 40       | AS04-HPV-16/18 | 1606  | 1  | 1  | 0.1 | 1586  | 0  | 0  | 0.0 | -     | -  | -  | -   |
|          | HBV            | 203   | 0  | 0  | 0.0 | 191   | 0  | 0  | 0.0 | 1446  | 1  | 1  | 0.1 |
|          | Not vaccinated | 290   | 0  | 0  | 0.0 | 344   | 0  | 0  | 0.0 | 233   | 1  | 1  | 0.4 |
| 42       | AS04-HPV-16/18 | 1606  | 0  | 0  | 0.0 | 1586  | 0  | 0  | 0.0 | -     | -  | -  | -   |
|          | HBV            | 203   | 0  | 0  | 0.0 | 191   | 0  | 0  | 0.0 | 1446  | 0  | 0  | 0.0 |
|          | Not vaccinated | 290   | 0  | 0  | 0.0 | 344   | 0  | 0  | 0.0 | 233   | 0  | 0  | 0.0 |
| 43       | AS04-HPV-16/18 | 1606  | 2  | 3  | 0.2 | 1586  | 1  | 1  | 0.1 | -     | -  | -  | -   |
|          | HBV            | 203   | 0  | 0  | 0.0 | 191   | 0  | 0  | 0.0 | 1446  | 0  | 0  | 0.0 |
|          | Not vaccinated | 290   | 1  | 1  | 0.3 | 344   | 0  | 0  | 0.0 | 233   | 1  | 1  | 0.4 |
| 44       | AS04-HPV-16/18 | 1606  | 1  | 1  | 0.1 | 1586  | 3  | 3  | 0.2 | -     | -  | -  | -   |
|          | HBV            | 203   | 0  | 0  | 0.0 | 191   | 0  | 0  | 0.0 | 1446  | 0  | 0  | 0.0 |
|          | Not vaccinated | 290   | 0  | 0  | 0.0 | 344   | 0  | 0  | 0.0 | 233   | 1  | 1  | 0.4 |
| 45       | AS04-HPV-16/18 | 1606  | 0  | 0  | 0.0 | 1586  | 1  | 1  | 0.1 | -     | -  | -  | -   |
|          | HBV            | 203   | 0  | 0  | 0.0 | 191   | 0  | 0  | 0.0 | 1446  | 1  | 1  | 0.1 |
|          | Not vaccinated | 290   | 2  | 2  | 0.7 | 344   | 1  | 1  | 0.3 | 233   | 0  | 0  | 0.0 |
| 51       | AS04-HPV-16/18 | 1606  | 8  | 26 | 1.6 | 1586  | 9  | 19 | 1.2 | -     | -  | -  | -   |
|          | HBV            | 203   | 2  | 2  | 1.0 | 191   | 2  | 3  | 1.6 | 1446  | 10 | 27 | 1.9 |
|          | Not vaccinated | 290   | 5  | 6  | 2.1 | 344   | 3  | 4  | 1.2 | 233   | 3  | 4  | 1.7 |
| 52       | AS04-HPV-16/18 | 1606  | 4  | 9  | 0.6 | 1586  | 5  | 5  | 0.3 | -     | -  | -  | -   |
|          | HBV            | 203   | 2  | 2  | 1.0 | 191   | 2  | 2  | 1.0 | 1446  | 5  | 9  | 0.6 |
|          | Not vaccinated | 290   | 2  | 2  | 0.7 | 344   | 3  | 4  | 1.2 | 233   | 3  | 3  | 1.3 |

| HPV Type | Group          | Arm A |    |    |     | Arm B |    |    |     | Arm C |    |    |     |
|----------|----------------|-------|----|----|-----|-------|----|----|-----|-------|----|----|-----|
|          |                | N     | n+ | n  | %   | N     | n+ | n  | %   | N     | n+ | n  | %   |
| 53       | AS04-HPV-16/18 | 1606  | 8  | 16 | 1.0 | 1586  | 7  | 12 | 0.8 | -     | -  | -  | -   |
|          | HBV            | 203   | 1  | 1  | 0.5 | 191   | 4  | 5  | 2.6 | 1446  | 6  | 14 | 1.0 |
|          | Not vaccinated | 290   | 4  | 4  | 1.4 | 344   | 2  | 2  | 0.6 | 233   | 3  | 3  | 1.3 |
| 54       | AS04-HPV-16/18 | 1606  | 4  | 4  | 0.2 | 1586  | 3  | 4  | 0.3 | -     | -  | -  | -   |
|          | HBV            | 203   | 0  | 0  | 0.0 | 191   | 0  | 0  | 0.0 | 1446  | 3  | 4  | 0.3 |
|          | Not vaccinated | 290   | 1  | 1  | 0.3 | 344   | 1  | 1  | 0.3 | 233   | 0  | 0  | 0.0 |
| 56       | AS04-HPV-16/18 | 1606  | 8  | 19 | 1.2 | 1586  | 9  | 17 | 1.1 | -     | -  | -  | -   |
|          | HBV            | 203   | 1  | 2  | 1.0 | 191   | 0  | 0  | 0.0 | 1446  | 7  | 17 | 1.2 |
|          | Not vaccinated | 290   | 1  | 1  | 0.3 | 344   | 2  | 2  | 0.6 | 233   | 3  | 3  | 1.3 |
| 58       | AS04-HPV-16/18 | 1606  | 5  | 6  | 0.4 | 1586  | 3  | 5  | 0.3 | -     | -  | -  | -   |
|          | HBV            | 203   | 0  | 0  | 0.0 | 191   | 0  | 0  | 0.0 | 1446  | 4  | 4  | 0.3 |
|          | Not vaccinated | 290   | 0  | 0  | 0.0 | 344   | 1  | 1  | 0.3 | 233   | 1  | 1  | 0.4 |
| 59       | AS04-HPV-16/18 | 1606  | 2  | 2  | 0.1 | 1586  | 5  | 7  | 0.4 | -     | -  | -  | -   |
|          | HBV            | 203   | 1  | 1  | 0.5 | 191   | 1  | 1  | 0.5 | 1446  | 6  | 11 | 0.8 |
|          | Not vaccinated | 290   | 1  | 1  | 0.3 | 344   | 1  | 1  | 0.3 | 233   | 2  | 2  | 0.9 |
| 66       | AS04-HPV-16/18 | 1606  | 6  | 9  | 0.6 | 1586  | 7  | 13 | 0.8 | -     | -  | -  | -   |
|          | HBV            | 203   | 3  | 3  | 1.5 | 191   | 1  | 1  | 0.5 | 1446  | 7  | 9  | 0.6 |
|          | Not vaccinated | 290   | 3  | 4  | 1.4 | 344   | 2  | 2  | 0.6 | 233   | 2  | 2  | 0.9 |
| 68       | AS04-HPV-16/18 | 1606  | 3  | 5  | 0.3 | 1586  | 1  | 3  | 0.2 | -     | -  | -  | -   |
|          | HBV            | 203   | 1  | 1  | 0.5 | 191   | 1  | 1  | 0.5 | 1446  | 3  | 5  | 0.3 |
|          | Not vaccinated | 290   | 0  | 0  | 0.0 | 344   | 1  | 1  | 0.3 | 233   | 2  | 2  | 0.9 |
| 70       | AS04-HPV-16/18 | 1606  | 0  | 0  | 0.0 | 1586  | 1  | 1  | 0.1 | -     | -  | -  | -   |
|          | HBV            | 203   | 0  | 0  | 0.0 | 191   | 1  | 1  | 0.5 | 1446  | 0  | 0  | 0.0 |
|          | Not vaccinated | 290   | 0  | 0  | 0.0 | 344   | 1  | 1  | 0.3 | 233   | 0  | 0  | 0.0 |
| 74       | AS04-HPV-16/18 | 1606  | 4  | 4  | 0.2 | 1586  | 2  | 2  | 0.1 | -     | -  | -  | -   |
|          | HBV            | 203   | 0  | 0  | 0.0 | 191   | 0  | 0  | 0.0 | 1446  | 1  | 1  | 0.1 |
|          | Not vaccinated | 290   | 0  | 0  | 0.0 | 344   | 1  | 1  | 0.3 | 233   | 0  | 0  | 0.0 |

AS04-HPV-16/18, AS04-adjuvanted HPV-16/18 vaccine; HBV, hepatitis B virus vaccine; N, number of subjects with available results; n+, number of communities with at least one event; n, number of subjects reporting an event.
